# Supplementary material for: Facile synthesis of hematite nanostructures with controlled hollowness and porosity and their comparative photocatalytic activities
Source: Royal Society of Chemistry journal article supplement (doi:10.1039/c3ce41899e), 2013-11-11
Supplement: c3ce41899e.pdf [file c3ce41899e.pdf]

Electronic Supplementary Information (ESI) for

Facile synthesis of hematite nanostructures with controlled hollowness and porosity and their comparative photocatalytic activities

Hanfeng Liang,<sup>a</sup> Xun Xu,<sup>b</sup> Wei Chen,<sup>a</sup> Binbin Xu<sup>a,b</sup> and Zhoucheng Wang<sup>\*a</sup>

<sup>a</sup>College of Chemistry and Chemical Engineering, <sup>b</sup>College of Materials, Xiamen University, Xiamen 361005, China  
Email: [zawang@xmu.edu.cn](mailto:zawang@xmu.edu.cn)

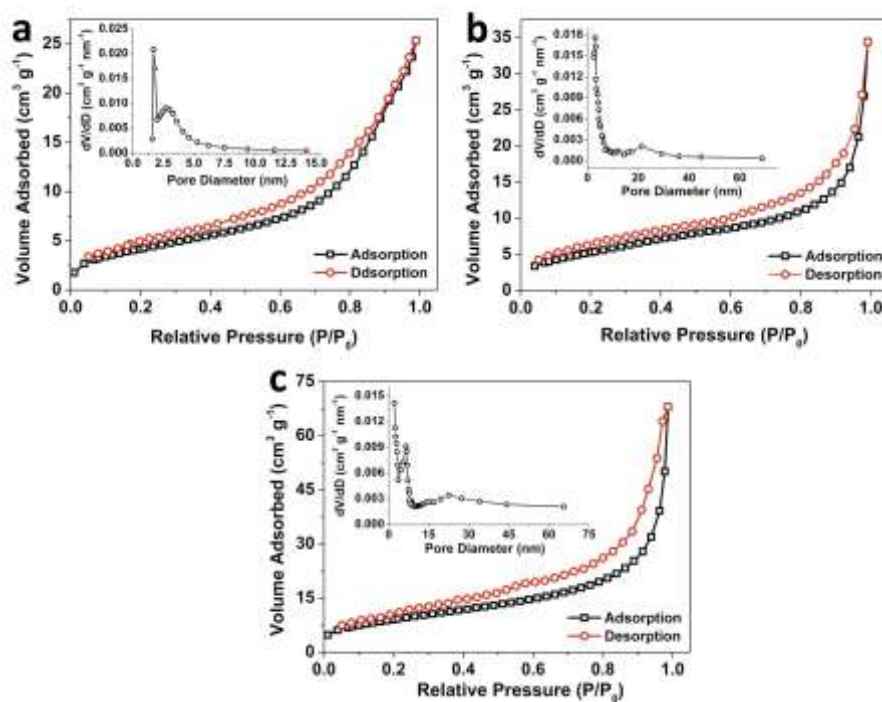

**Fig. S1** N<sub>2</sub> adsorption-desorption isotherms samples A (a), B (b), and C (c). The insets show the pore size distributions calculated by the BJH method from desorption branch of the isotherm.
